# Supplementary material for: Investigation of the lattice thermal transport properties of Janus XClO (X = Cr, Ir) monolayers by first-principles calculations
Source: Royal Society of Chemistry journal article supplement (doi:10.1039/d3cp04306a), 2024-01-01
Supplement: d3cp04306a2.pdf [file d3cp04306a2.pdf]

# Investigation of Lattice Thermal Transport Properties of Janus XCIO (X=Cr, Ir) Monolayer by First-principles

## Calculations

Peng Gao<sup>b</sup>, Xihao Chen<sup>a,c,d</sup>, Zonghang Liu<sup>e</sup>, Jiwen Li<sup>f</sup>, Ning Wang<sup>g</sup>

<sup>a</sup>School of Materials Science and Engineering, Chongqing University of Arts and Sciences, Chongqing, 402160, China.

<sup>b</sup>School of Chemistry and Molecular Bioscience, University of Wollongong, NSW 2500, Australia

<sup>c</sup>Chongqing Key Laboratory of Precision Optics, Chongqing Institute of East China Normal University, Chongqing 401120, China.

<sup>d</sup>State Key Laboratory of Precision Spectroscopy, East China Normal University, Shanghai 200062, China

<sup>e</sup>School of Science and Engineering, Shenzhen Key Laboratory of Functional Aggregate Materials, The Chinese University of Hong Kong, Shenzhen 518172, China.

<sup>f</sup>College of Physics and Electronic Engineering, Northwest Normal University, Lanzhou 730070, China.

<sup>g</sup>School of Science, Xihua University, Chengdu 610039, China.

\*: Corresponding Author: Xihao Chen; xihaochen@cqwu.edu.cn

\*\* : Corresponding Author: Ning Wang; ningwang0213@163.com;

## Supplementary Information (SI)

The structure coordination of CrClO unit cell:

1.0

|              |              |               |
|--------------|--------------|---------------|
| 3.8887500763 | 0.0000000000 | 0.0000000000  |
| 0.0000000000 | 3.2132298946 | 0.0000000000  |
| 0.0000000000 | 0.0000000000 | 20.0000000000 |

| Cr | Cl | O |
|----|----|---|
| 2  | 2  | 2 |

Direct

|              |              |             |
|--------------|--------------|-------------|
| 0.500000000  | 0.500000000  | 0.542909050 |
| -0.000000000 | -0.000000000 | 0.457090998 |
| 0.000000000  | 0.500000000  | 0.372164011 |
| 0.500000000  | -0.000000000 | 0.627835989 |
| 0.500000000  | -0.000000000 | 0.479659986 |
| -0.000000000 | 0.500000000  | 0.520340014 |

The structure coordination of IrClO unit cell:

1.0

|              |              |               |
|--------------|--------------|---------------|
| 4.0859198570 | 0.0000000000 | 0.0000000000  |
| 0.0000000000 | 3.3764901161 | 0.0000000000  |
| 0.0000000000 | 0.0000000000 | 20.0000000000 |

| Ir | Cl | O |
|----|----|---|
| 2  | 2  | 2 |

Direct

|              |              |             |
|--------------|--------------|-------------|
| 0.500000000  | 0.500000000  | 0.545497990 |
| -0.000000000 | -0.000000000 | 0.454502010 |
| -0.000000000 | 0.500000000  | 0.375256014 |
| 0.500000000  | -0.000000000 | 0.624743986 |
| 0.500000000  | -0.000000000 | 0.478155994 |
| 0.000000000  | 0.500000000  | 0.521844006 |

The structure coordination of CrIrClO unit cell:

1.0

|              |              |               |
|--------------|--------------|---------------|
| 4.0170898438 | 0.0000000000 | 0.0000000000  |
| 0.0000000000 | 3.2956500053 | 0.0000000000  |
| 0.0000000000 | 0.0000000000 | 20.0000000000 |

| Cr | Ir | Cl | O |
|----|----|----|---|
| 1  | 1  | 2  | 2 |

Direct

|              |              |             |
|--------------|--------------|-------------|
| 0.500000000  | 0.500000000  | 0.541862011 |
| -0.000000000 | -0.000000000 | 0.455716038 |
| -0.000000000 | 0.500000000  | 0.374339008 |
| 0.500000000  | 0.000000000  | 0.625345993 |
| 0.500000000  | -0.000000000 | 0.479332018 |
| -0.000000000 | 0.500000000  | 0.523405027 |
